# Supplementary material for: Size control of nanoparticles synthesized by pulsed laser ablation in liquids using donut-shaped beams
Source: publisher site journal article supplement (doi:10.3762/bjnano.16.31), 2025-03-25
Supplement: Additional file 1 [file 2190-4286-16-31-S1.pdf]

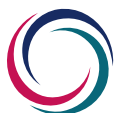

## Supporting Information

for

### **Size control of nanoparticles synthesized by pulsed laser ablation in liquids using donut-shaped beams**

Abdel Rahman Altakroury, Oleksandr Gatsa, Farbod Riahi, Zongwen Fu, Miroslava Flimelová, Andrei Samokhvalov, Stephan Barcikowski, Carlos Doñate-Buendía, Alexander V. Bulgakov and Bilal Gökce

*Beilstein J. Nanotechnol.* **2025**, *16*, 407–417. [doi:10.3762/bjnano.16.31](https://doi.org/10.3762/bjnano.16.31)

## Additional experimental data

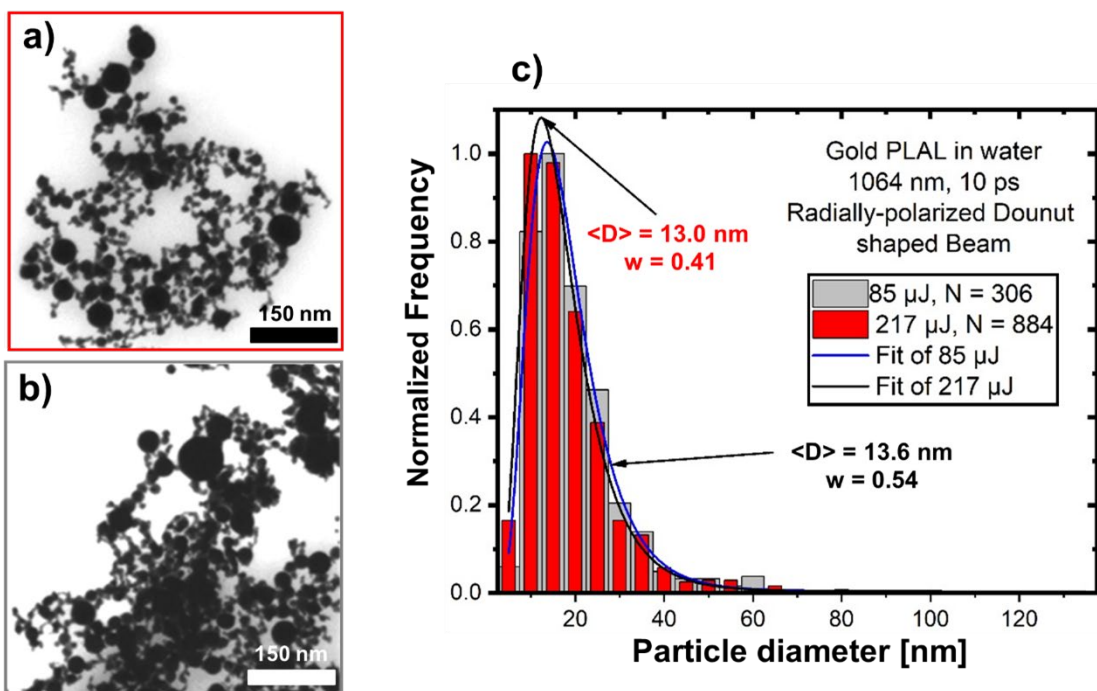

**Figure S1:** Comparison of gold NPs produced by PLAL with radially polarized donut-shaped laser beams at pulse energies of 85 and 217  $\mu\text{J}$ . (a, b) SEM micrographs of NPs obtained using pulse energies of 85 and 217  $\mu\text{J}$ , respectively. (c) NP size distributions showing the number of analyzed NPs ( $N$ ), the median diameter ( $\langle D \rangle$ ), and the polydispersity index ( $w$ ) values derived from the log-normal approximations (solid lines).

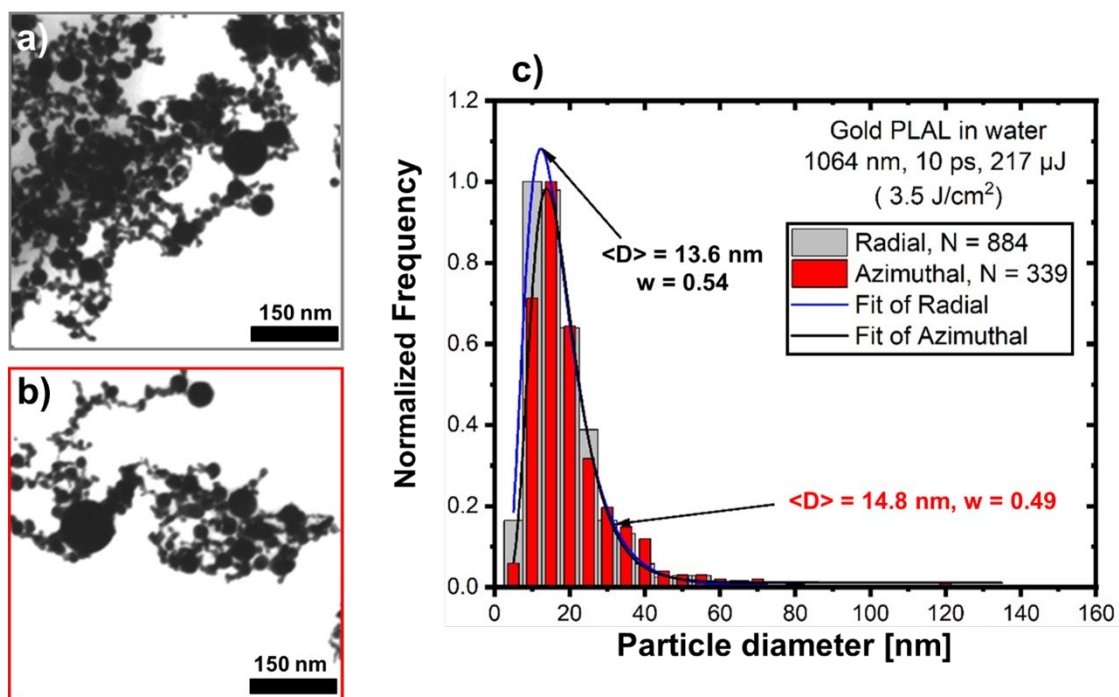

**Figure S2:** Comparison of gold NPs produced by PLAL with radially polarized donut-shaped and azimuthally polarized donut-shaped laser beams at a pulse energy of 217  $\mu\text{J}$ . (a, b) SEM micrographs of NPs obtained using the radially polarized donut-shaped and azimuthally polarized donut-shaped beams, respectively. (c) NP size distributions showing the number of analyzed NPs ( $N$ ), the median diameter ( $\langle D \rangle$ ), and the polydispersity index ( $w$ ) values derived from the log-normal approximations (solid lines).

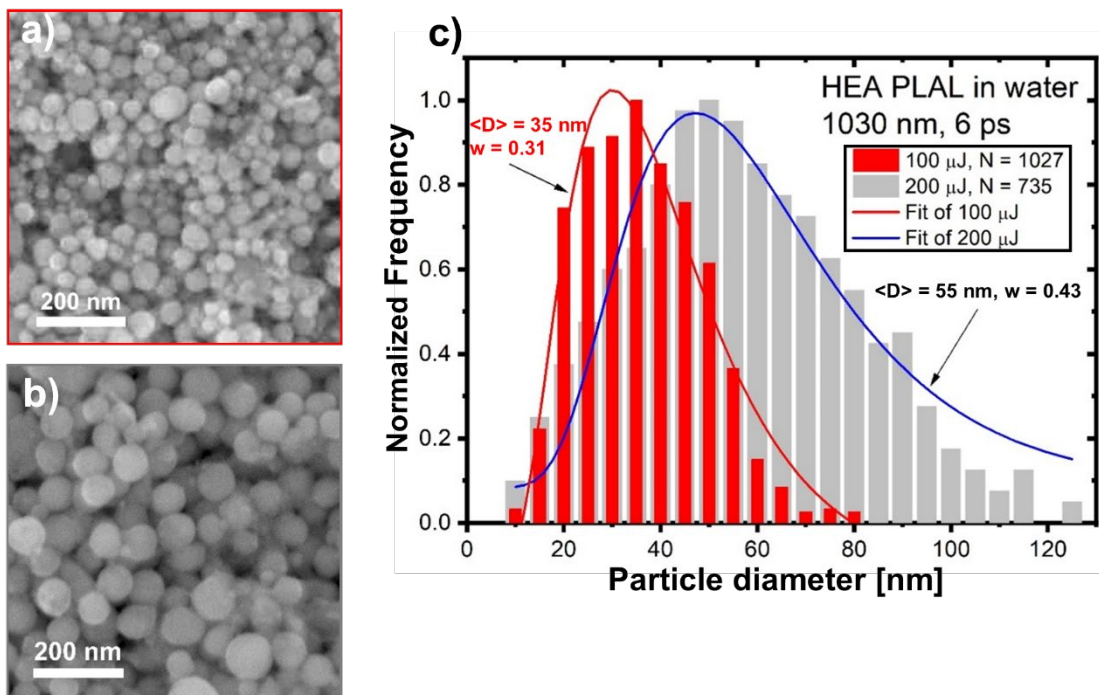

**Figure S3:** Comparison of HEA NPs produced by PLAL with radially polarized donut-shaped laser beams at pulse energies of 100 and 200  $\mu\text{J}$ . (a, b) SEM micrographs of NPs obtained using pulse energies of 100 and 200  $\mu\text{J}$ , respectively. (c) NP size distributions showing the number of analyzed NPs ( $N$ ), the median diameter ( $\langle D \rangle$ ), and the polydispersity index ( $w$ ) values derived from the log-normal approximations (solid lines).

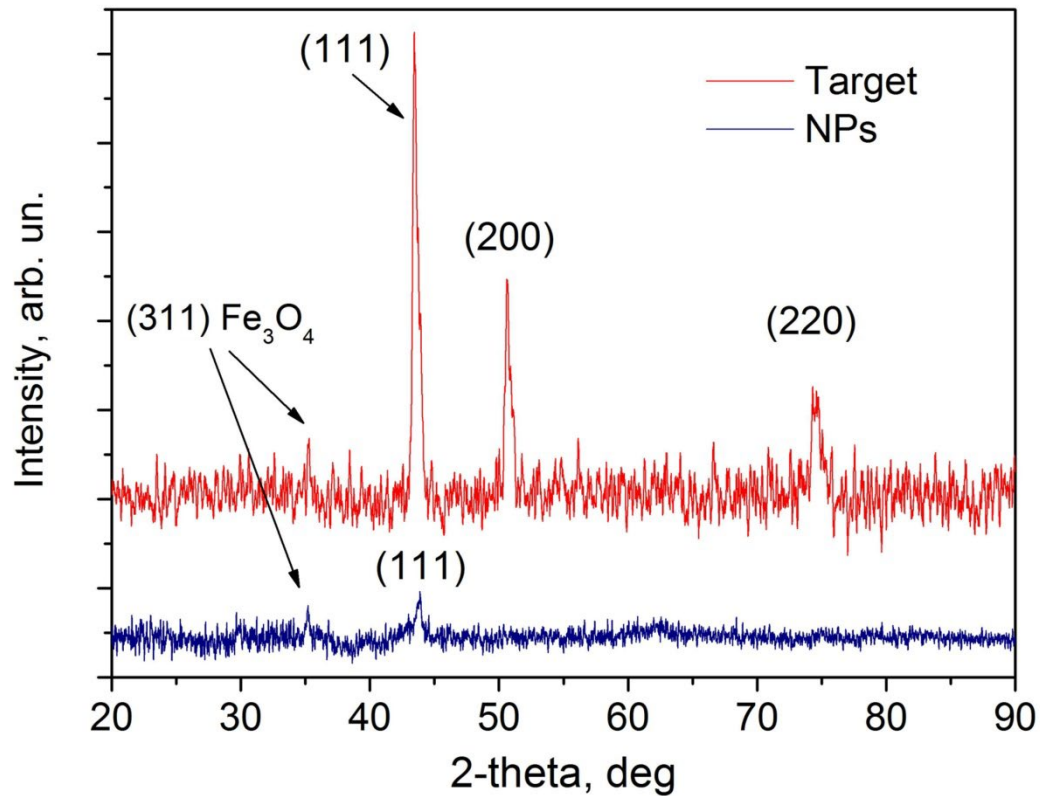

**Figure S4:** XRD patterns for the HEA target and NPs generated by PLAL by a donut-shaped laser beam at a pulse energy of 100  $\mu$ J. The crystalline HEA phase is represented by peaks corresponding to (111), (200), and (220) Bragg reflections of the face-centered cubic lattice. An additional (311) peak at  $2\theta = 35.2^\circ$  corresponds to the cubic Fe<sub>3</sub>O<sub>4</sub> phase. The height ratio of the oxide peak to the (111) peak is higher for NPs.
